# Supplementary material for: Is the Atlantic Ocean driving the recent variability in South Asian dust?
Source: Copernicus journal article supplement (doi:10.5194/acp-2020-1305), 2021-02-10
Supplement: Supplementary file 1 [file acp-2020-1305-supplement.pdf]

## Supplementary Information

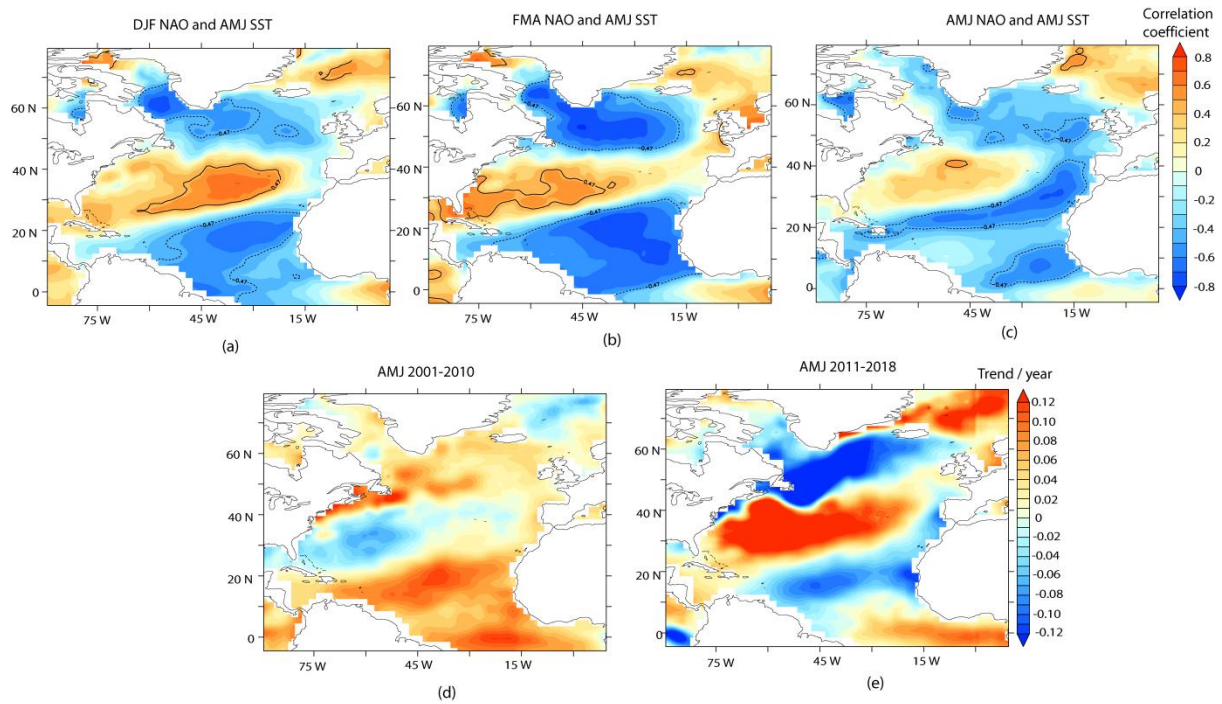

**Fig. S1** Correlation between April-June North Atlantic SST and NAO index for (a) December-February, (b) February-April and (c) April-June for 2001-2018. Continuous (dashed) contours enclose the regions which have positive (negative) correlation coefficients significant at 95% confidence level. (d) and (e) Trends in April-June SST over the North Atlantic for 2001-2010 and 2011-2018.

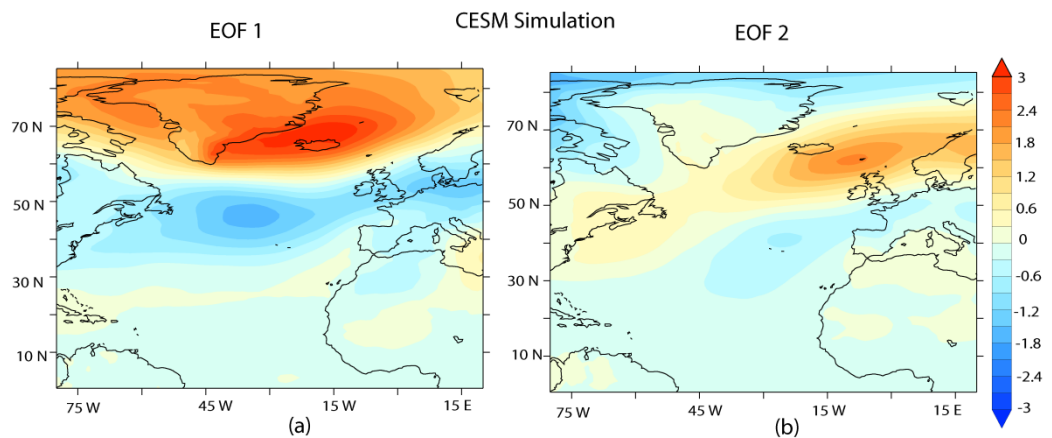

**Fig. S2** EOFs of summer sea level pressure constructed using CESM Ctrl simulation for model years 0006-0015. EOF1 shows the summer NAO pattern and EOF2 shows SEA pattern.
